# Supplementary material
Source: MDPI journal article supplement (https://www.mdpi.com/1424-2818/13/11/571)
Supplement: s1 [file s1]

# Local Actions to Tackle a Global Problem: A Multidimensional Assessment of the Pollination Crisis in Chile

Lorena Vieli, Maureen M. Murúa, Luis Flores-Prado, Gastón O. Carvallo, Carlos E. Valdivia, Giselle Muschett, Manuel López-Aliste, Constanza Andía, Christian Jofré-Pérez, and Francisco E. Fontúrbel

**Table S1.** Area of harvested crops species in 2019 [1] classified according to their pollinator dependency (following Klein et al. [2]) using a discrete scale: 1 = little dependent, 2 = moderately dependent, 3 = highly dependent, and 4 = essential.

| Crop Species                                 | Area (ha) | Pollinator Dependency | Area Percentage of Pollinator Dependent Crops (%) |
|----------------------------------------------|-----------|-----------------------|---------------------------------------------------|
| Persimmons                                   | 112       | 1                     | 0.0                                               |
| Papayas                                      | 151       | 1                     | 0.0                                               |
| Grapefruit (inc. pomelos)                    | 272       | 1                     | 0.1                                               |
| Chillies and peppers, green                  | 763       | 1                     | 0.2                                               |
| Beans, green                                 | 2632      | 1                     | 0.8                                               |
| Linseed                                      | 4157      | 1                     | 1.3                                               |
| Oranges                                      | 6244      | 1                     | 1.9                                               |
| Lemons and limes                             | 6655      | 1                     | 2.1                                               |
| Tangerines, mandarins, clementines, satsumas | 7797      | 1                     | 2.4                                               |
| Beans, dry                                   | 10248     | 1                     | 3.2                                               |
| Tomatoes                                     | 15202     | 1                     | 4.7                                               |
| Lupins                                       | 21280     | 1                     | 6.6                                               |
| Currants                                     | 1         | 2                     | 0.0                                               |
| Figs                                         | 65        | 2                     | 0.0                                               |
| Strawberries                                 | 1064      | 2                     | 0.3                                               |
| Chestnut                                     | 1263      | 2                     | 0.4                                               |
| Sunflower seed                               | 3228      | 2                     | 1.0                                               |
| Rapeseed                                     | 48166     | 2                     | 15.0                                              |
| Cherries, sour                               | 4         | 3                     | 0.0                                               |
| Apricots                                     | 664       | 3                     | 0.2                                               |
| Cucumbers and gherkins                       | 1682      | 3                     | 0.5                                               |
| Raspberries                                  | 3888      | 3                     | 1.2                                               |
| Pears                                        | 7387      | 3                     | 2.3                                               |
| Almonds, with shell                          | 8867      | 3                     | 2.8                                               |
| Peaches and nectarines                       | 15651     | 3                     | 4.9                                               |
| Plums and sloes                              | 17811     | 3                     | 5.5                                               |
| Blueberries                                  | 18373     | 3                     | 5.7                                               |
| Avocados                                     | 29224     | 3                     | 9.1                                               |
| Apples                                       | 32371     | 3                     | 10.1                                              |

|                                  |       |   |      |
|----------------------------------|-------|---|------|
| Cherries                         | 38392 | 3 | 12.0 |
| Quinces                          | 318   | 4 | 0.1  |
| Watermelons                      | 2918  | 4 | 0.9  |
| Melons, other (inc. cantaloupes) | 3091  | 4 | 1.0  |
| Pumpkins, squash and gourds      | 3487  | 4 | 1.1  |
| Kiwi fruit                       | 7595  | 4 | 2.4  |

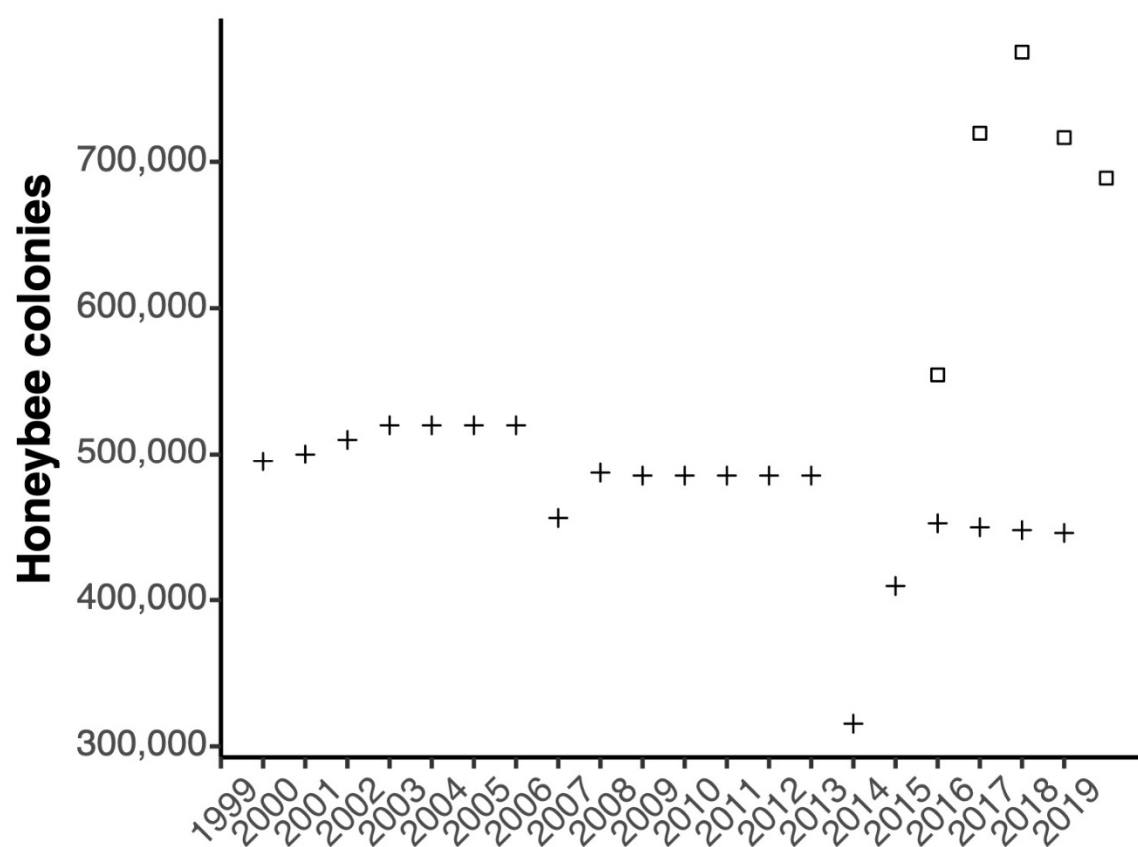

**Figure S1.** Honeybee colonies stocks in Chile by year. Two different data sources are presented, FAOSTATS from FAO [1] in cross (+) and Chilean Agricultural and Livestock Service [3] in squares (□).

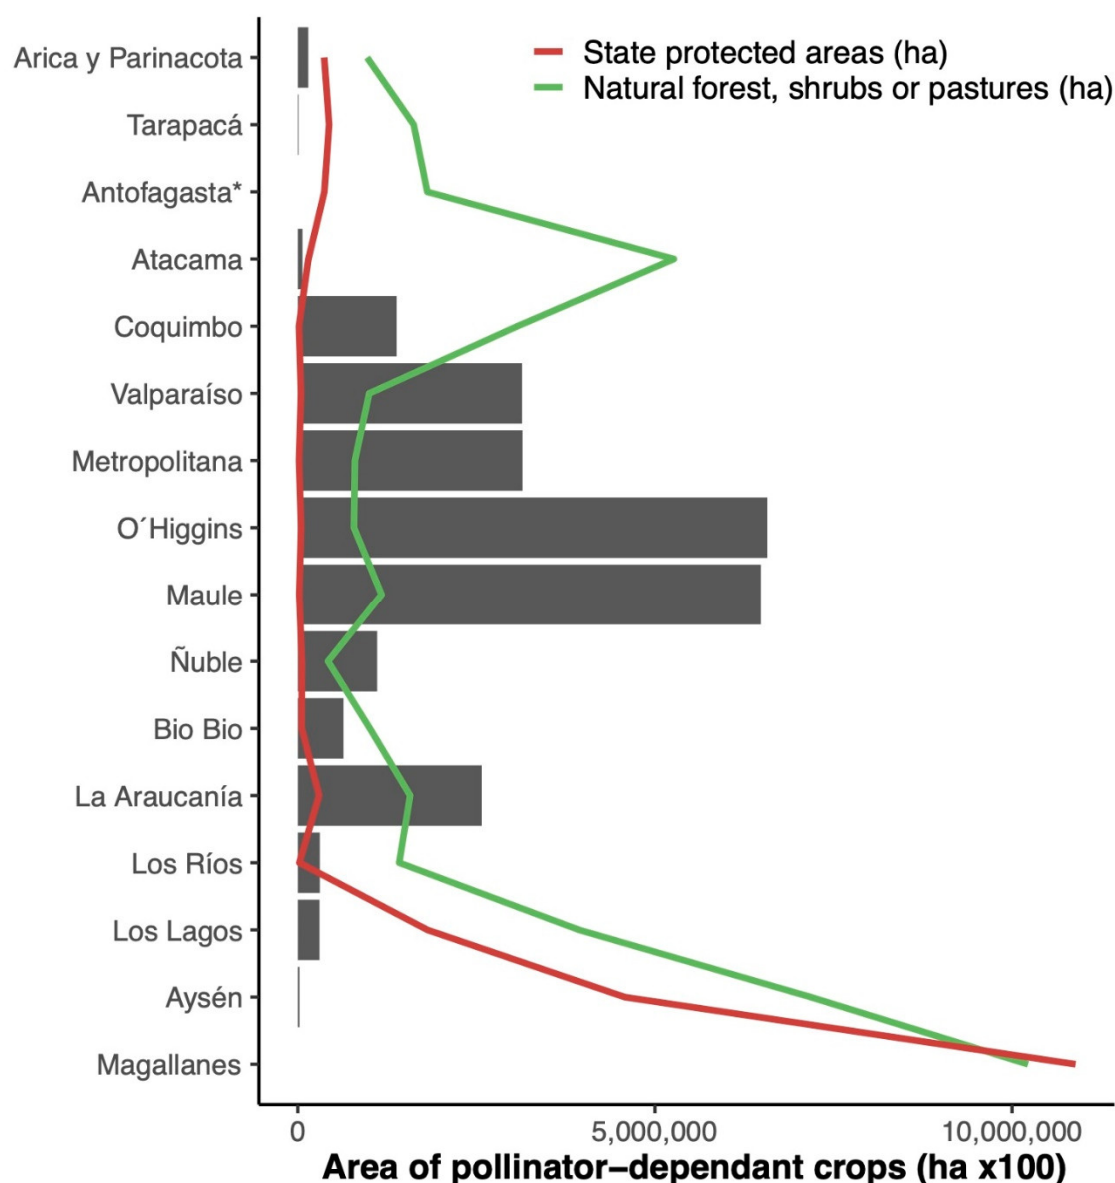

**Figure S2.** Regional comparison of pollinator-dependent crops area (crops data retrieved from ODEPA-CIREN [4] and species classified as pollinator dependent according to Klein et al. [2]), natural areas (after CONAF [5]) and State protected areas (CONAF [6]; Ministerio de Bienes Nacionales [7]). Note that crop areas are multiplied by 100 while natural areas and State protected areas are not.

### Supplementary Material References

1. FAO. *FAOSTAT Statistics Database (updated March 2021)*; Food and Agriculture Organization of the United Nations: Rome, 2021.
2. Klein, A.M.; Vaissiere, B.E.; Cane, J.H.; Steffan-Dewenter, I.; Cunningham, S.A.; Kremen, C.; Tscharntke, T. Importance of pollinators in changing landscapes for world crops. *P Roy Soc B-Biol Sci* **2007**, *274*, 303–313, doi:10.1098/rspb.2006.3721.
3. SAG. *Response letter N° 3462 (May 26th 2021) by request under the law 20.285 of access to public information*; Chilean Ministry of Agriculture: Santiago de Chile, 2021.
4. ODEPA-CIREN. *Estadísticas productivas*; <https://www.odepa.gob.cl/estadisticas-del-sector/estadisticas-productivas> (accessed October 26, 2021): 2021.
5. CONAF. *Catastro de Uso de Suelo y vegetación*; <https://sit.conaf.cl/> (Accessed October 26, 2021): 2020.
6. CONAF. *Sistema Nacional de Áreas Silvestres del Estado*; <http://www.parquesnacionales.cl/que-es-el-snaspe/#1510943255251-18331449-35cc> (Accessed October 26, 2021): 2021.
7. Ministerio de Bienes Nacionales. <http://patrimonio.bienes.cl/categoria-del-patrimonio/patrimonio-natural/santuarios-de-la-naturaleza/?cat=santuarios-de-la-naturaleza&reg=arica-y-parinacota&keyword=> (Accessed October 26, 2021): 2021.
